# Supplementary material
Source: PubMed Central journal article supplement (PMC6943823)
Supplement: NIHMS1545867-supplement-1.pdf [file NIHMS1545867-supplement-1.pdf]

## **Supplementary Data**

### **Data S1. Disease-associated Gene Set Lists. Related to Figure 3, Figure 4, and Figure 5.**

Includes a collection of spreadsheets presenting the gene sets used for disease network association analyses, including genes from DisGeNET, SZDB2, and from GWAS studies.

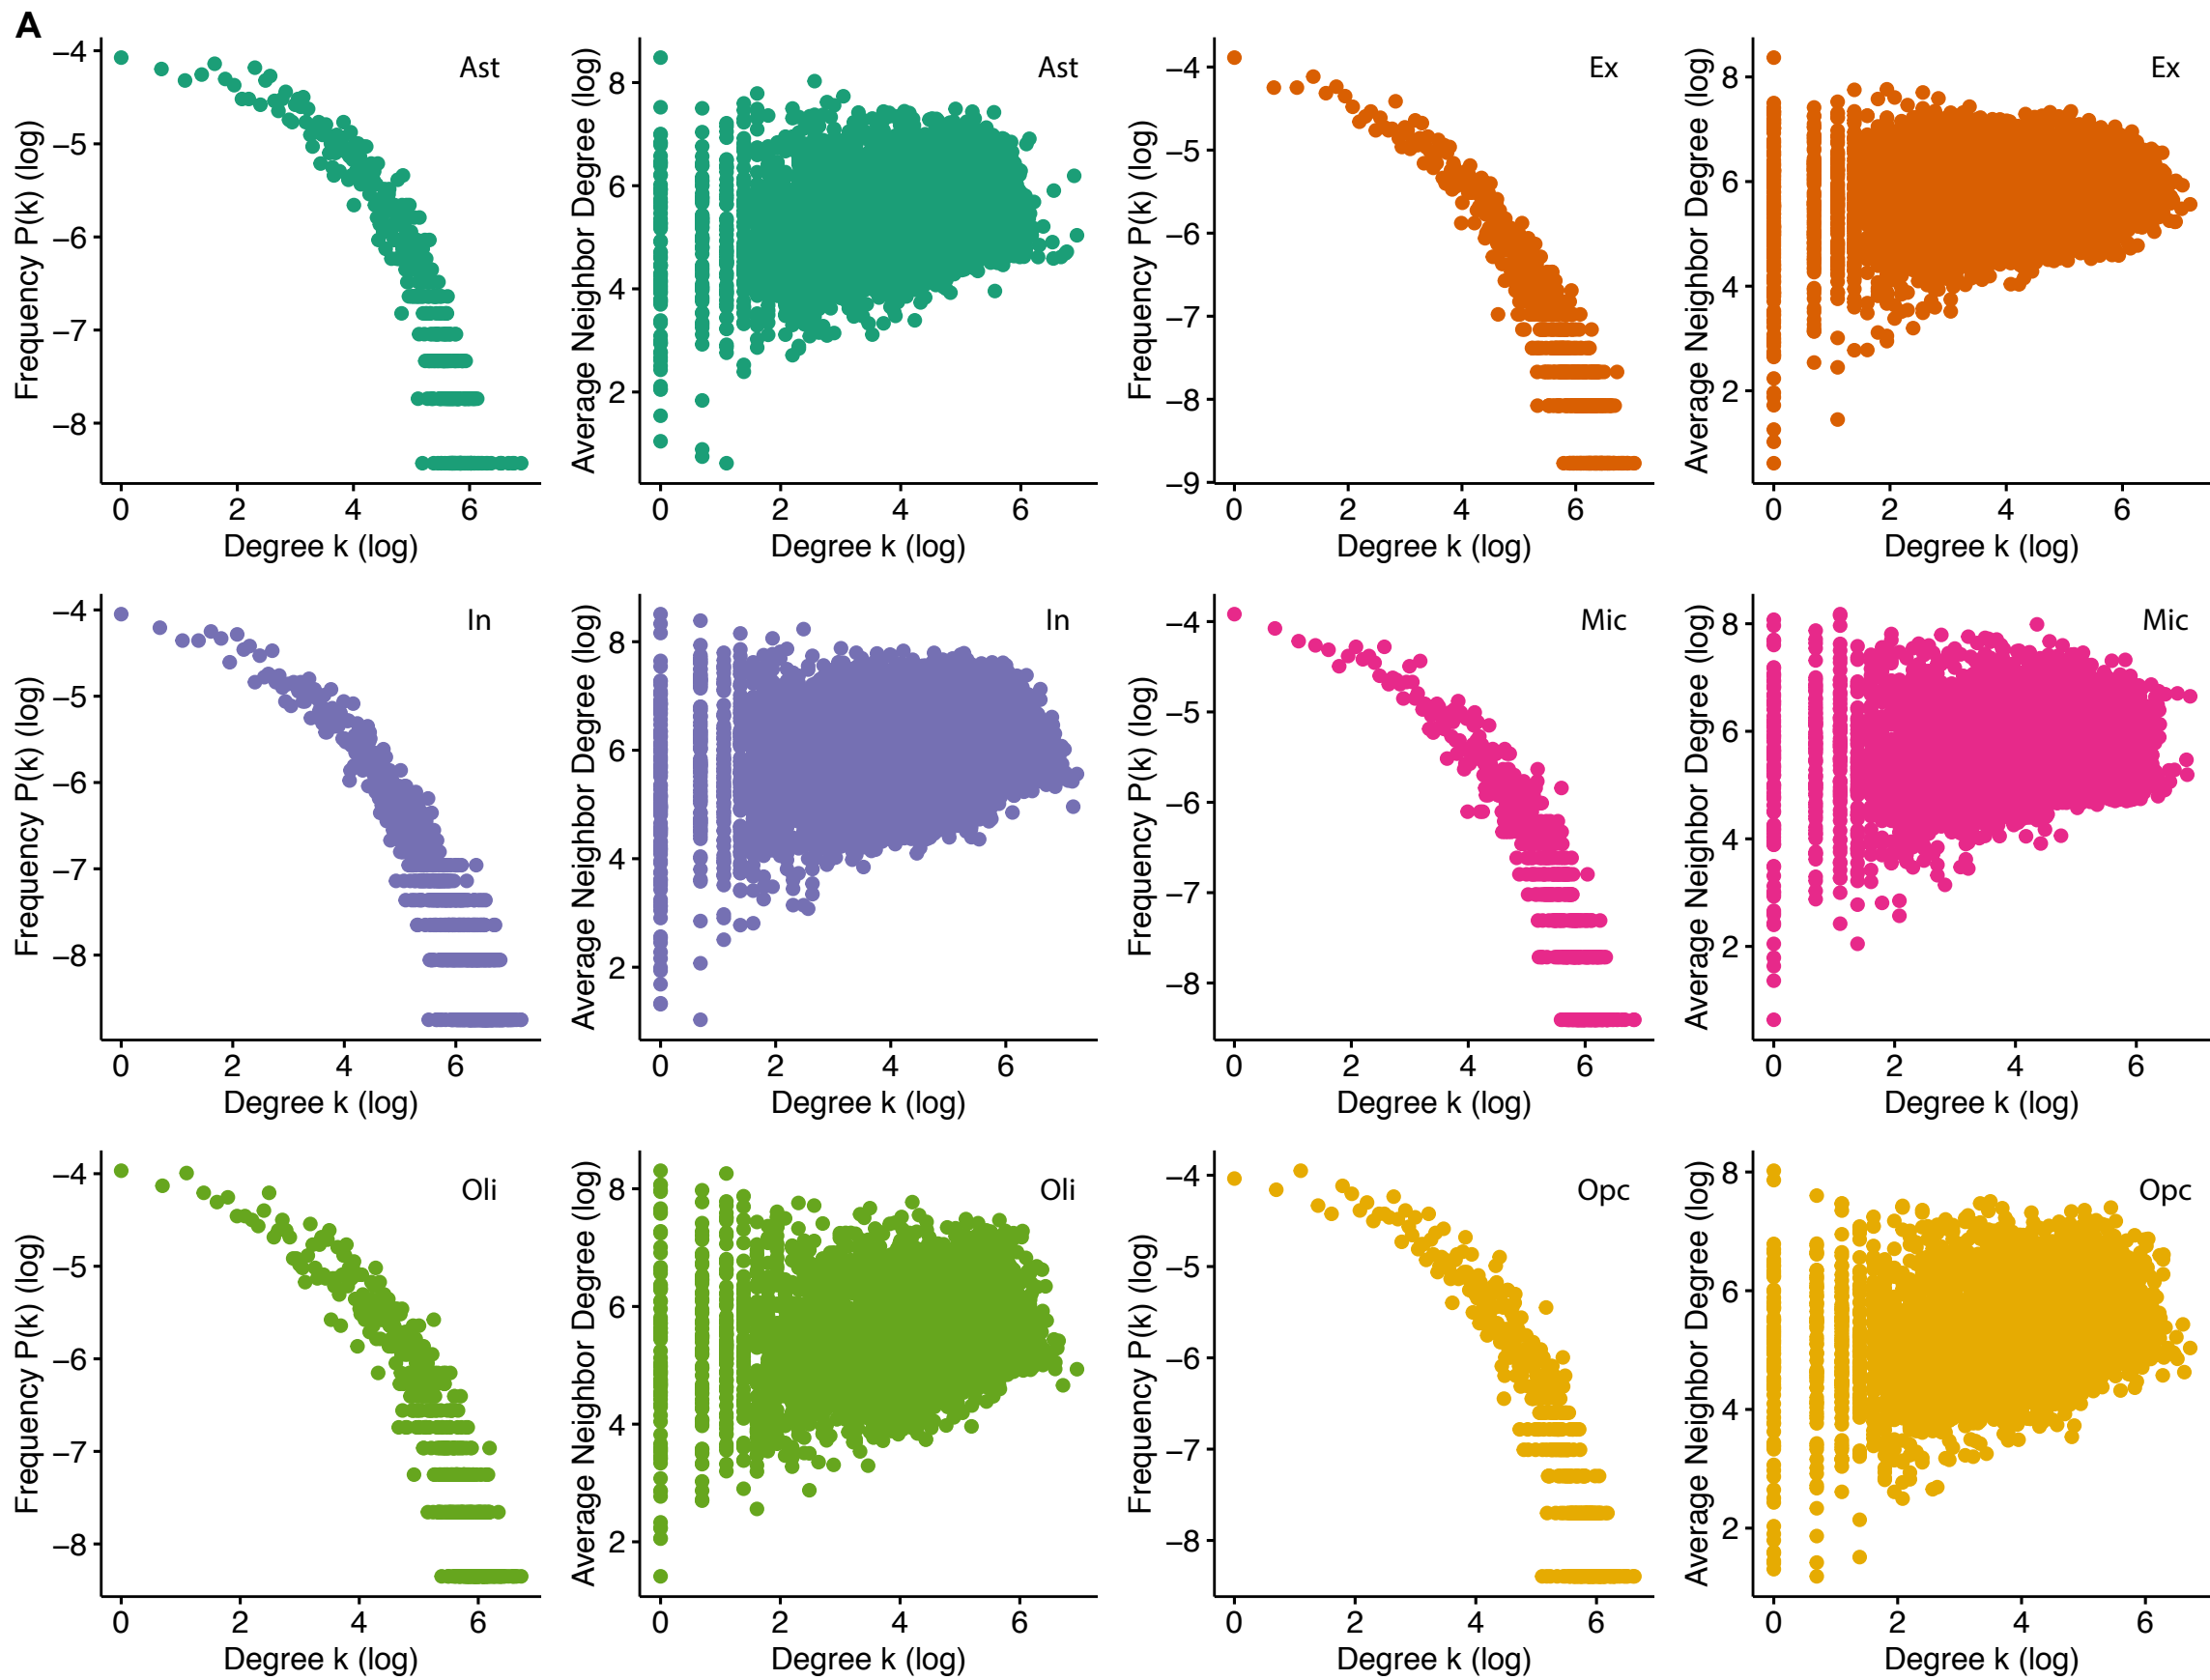

**B** Patterns of shared and private interactions

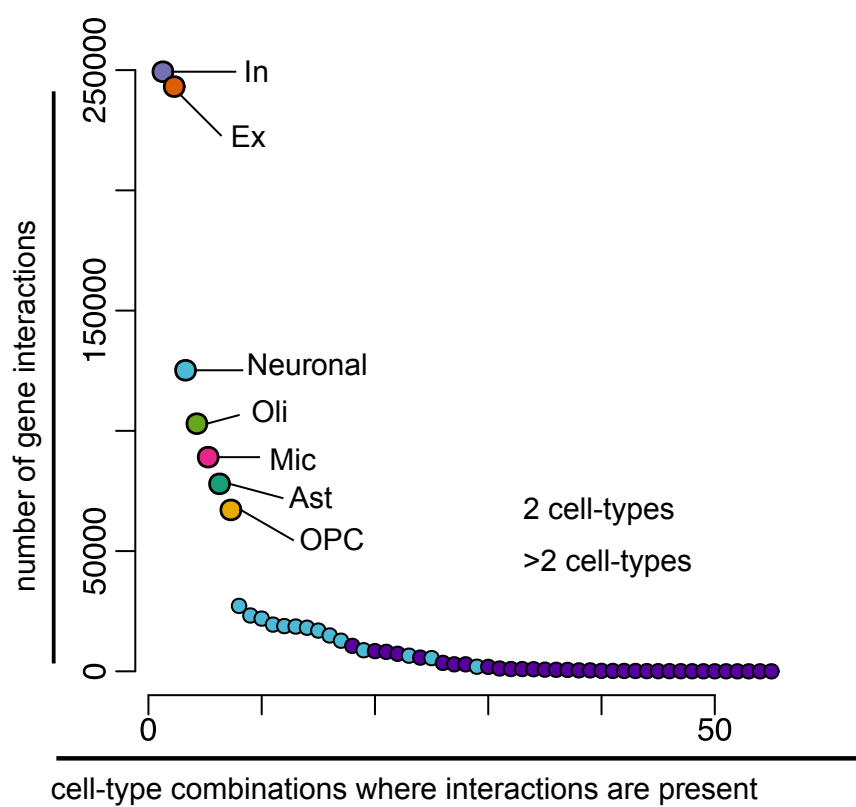

**C** Interaction overlap-based similarity

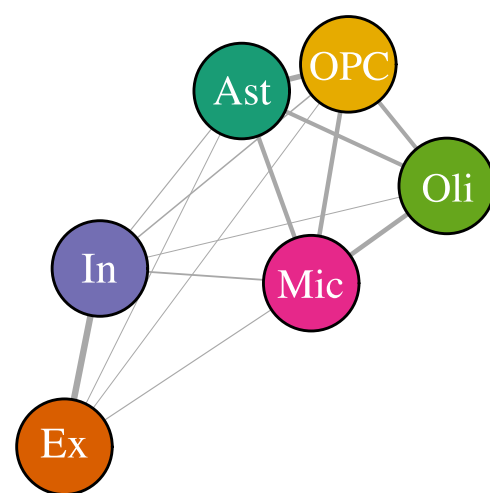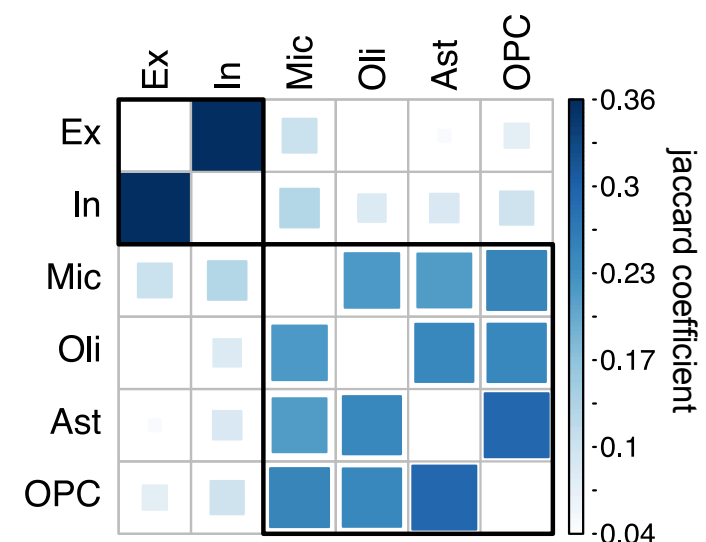

**Figure S1. Gene connectivity and partner preference distributions across cell-type specific interactomes, Related to Figure 2.** **A**, Degree (total number of interactions of a given gene) distributions are displayed in log scale (left). Patterns of gene neighbors' connectivity as a function of a gene's degree are displayed in log scale (right). Overall, connected genes show a slight preference to interact with genes. **B**, number of gene interactions that are observed in only one cell-type (cell-type colors), only two different cell-types (light blue), or more than two different cell-types (purple). Cell-type combinations refers to any combination of one or more cell-types in which a gene interaction occurs. **C**, Network representation linking cell-types based on the degree of overlap in shared gene interactions (left). Cell-types that share more interactions appear positioned close together. Edge weight is proportional to the degree of overlap. Degree of overlap in interactions is quantified using the pairwise jaccard coefficient. Corresponding Jaccard coefficients are shown in matrix form (right).

**A**

raw expression

imputed expression

transformed expression

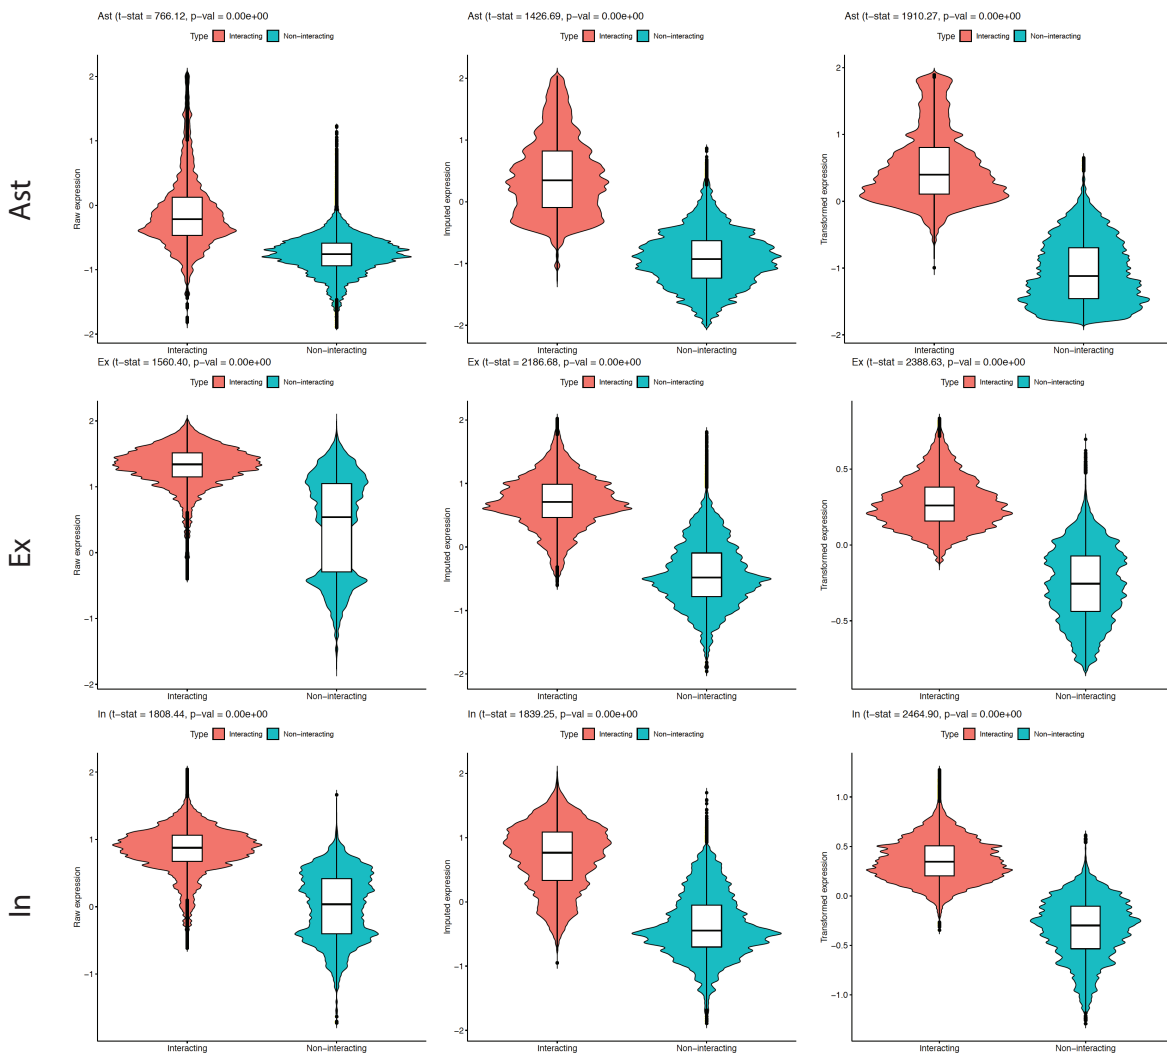**B**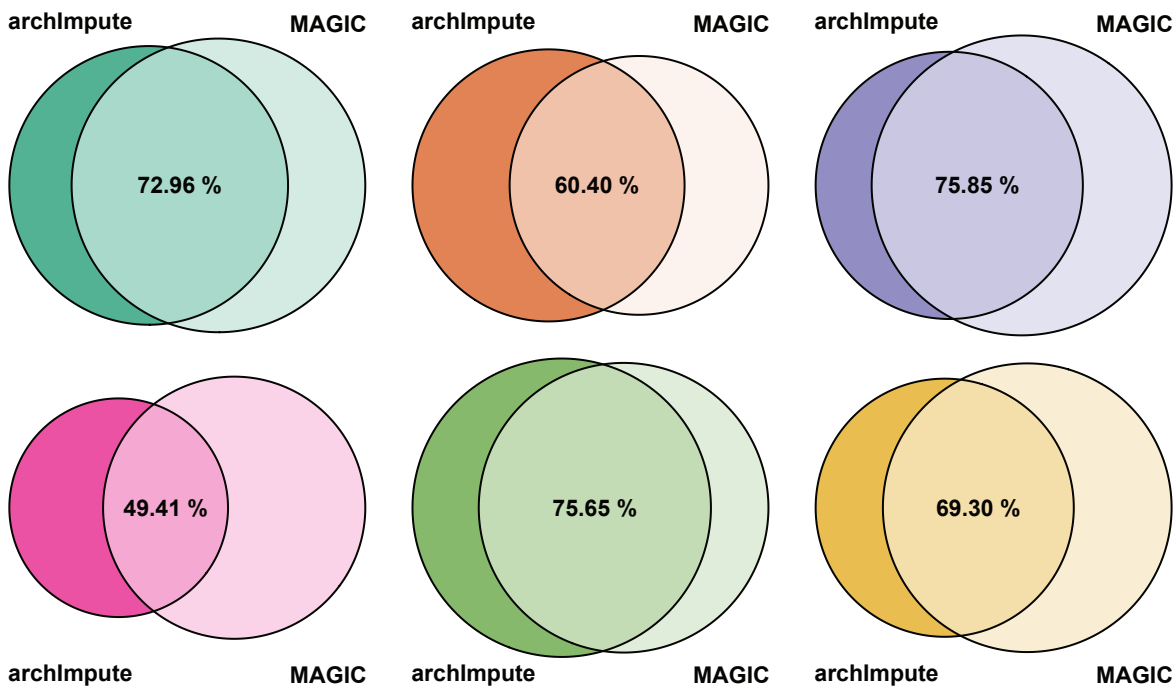

**Figure S2. SCINET robustness to data transformation and imputation, Related to STAR Methods. A,** Plots show raw (input) expression values, as well as imputed (archimpute) and transformed after imputed expression values for genes predicted as interacting in the given cell-type (row) vs. genes predicted as non-interacting. Expression values at three different levels of processing: raw expression values, imputed expression values (archimpute), and transformed after imputed expression values. For each gene pair, the minimum value of expression of the two genes is shown. Three representative cell types are presented due to space constraints. **B,** Each panel shows the overlap of identified edges, after thresholding  $p$ -values (0.05), across different cell types. Except in microglia, the majority of predicted edges overlap with each other, with the strongest overlap observed in inhibitory neuron and oligodendrocyte-specific networks. Expression values for genes were imputed, independently, using either ACTION-based archetype imputation (archImpute, see Methods) or MAGIC method. Imputed profiles were used to infer cell-type specificity of edges.

**A****network size effect of perturbation**

(number of genes after perturbation/initial number of genes)

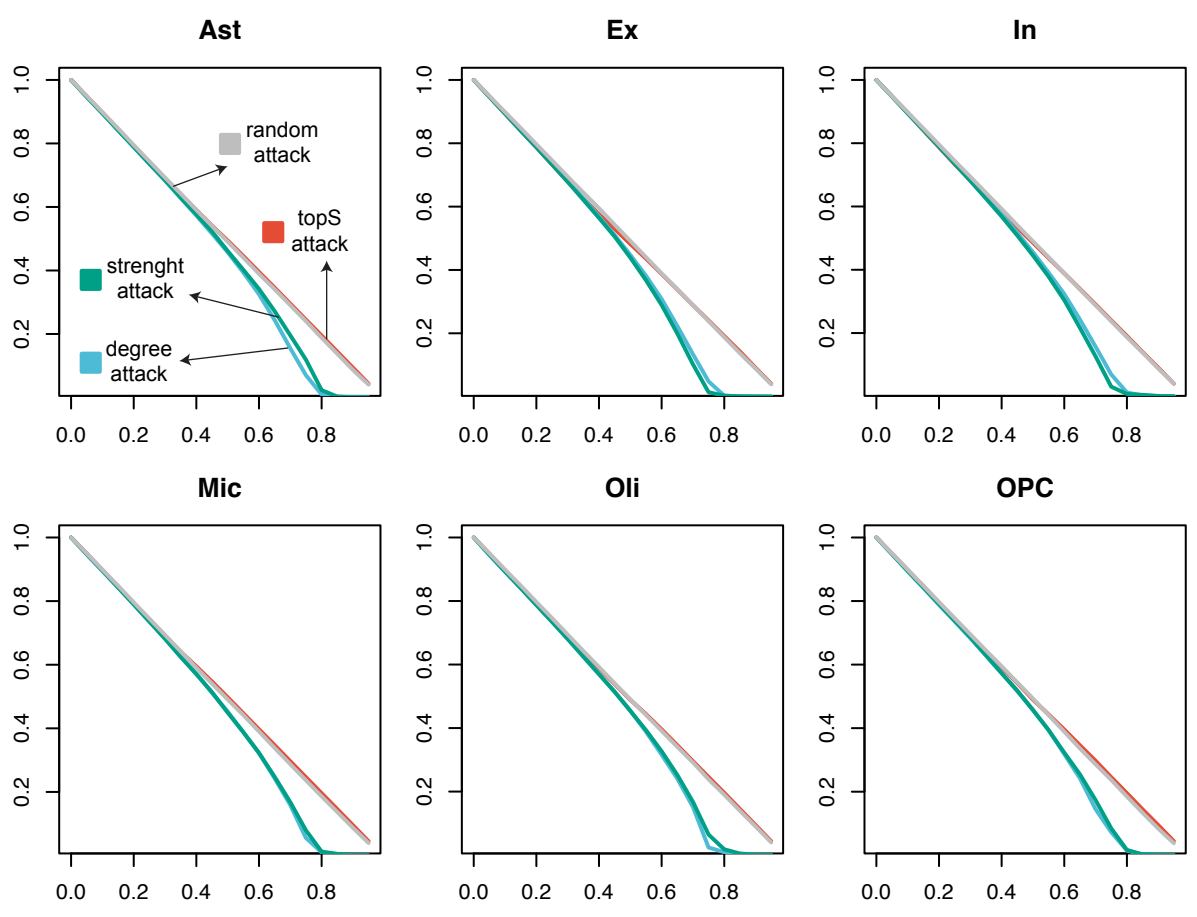**B****network connectivity effect of perturbation**

(number of edges after perturbation/initial number of edges)

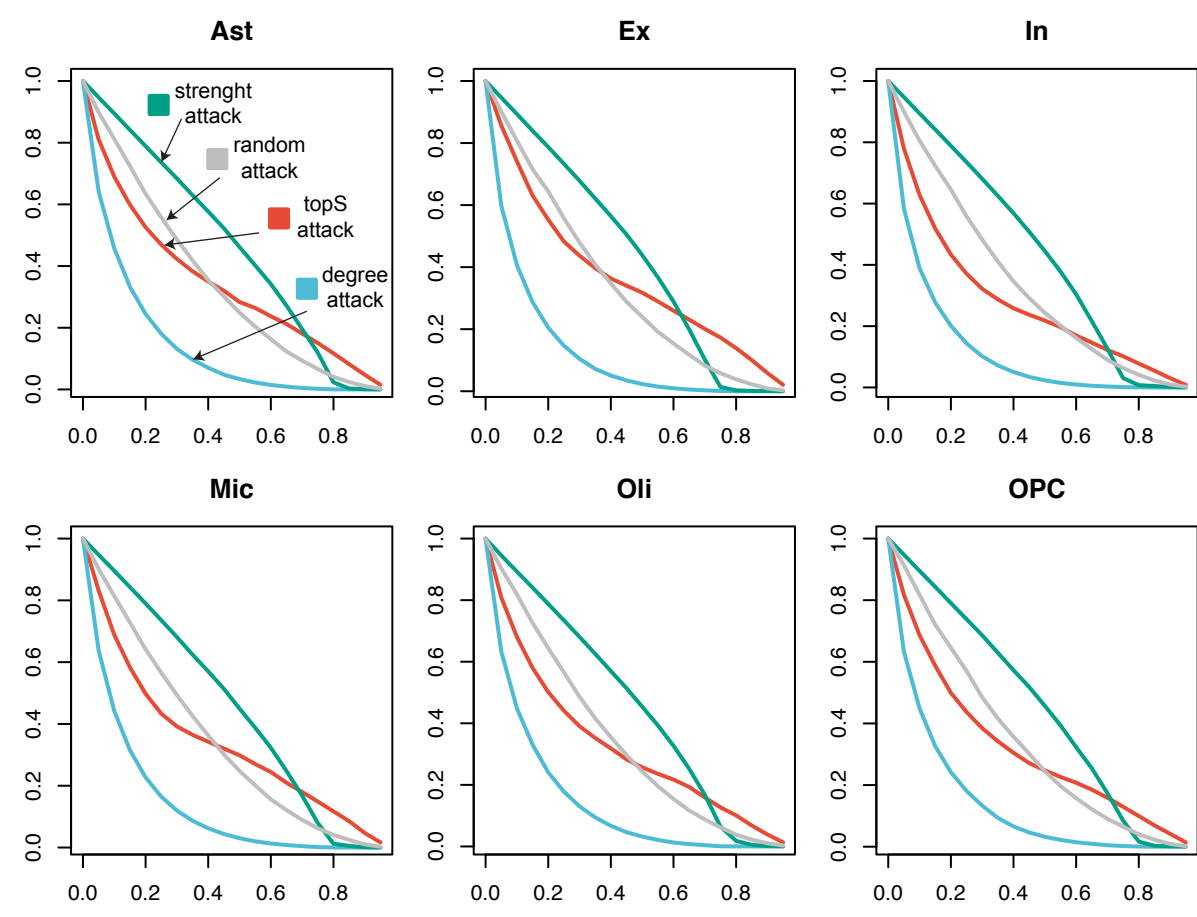

fraction of perturbed genes

**Figure S3. Simulated perturbation experiments, Related to Figure 2.** **A**, Decrease in the size (number of genes) of the largest connected component as a function of incremental node removal perturbations. **B**, Decrease in the total connectivity (number of edges) of the largest connected component as a function of incremental node removal perturbations. The type of attack (strength, random, topS, or degree) determines the decreasing order in which genes are removed -- i.e., starting with genes with the highest value of the metric.

A

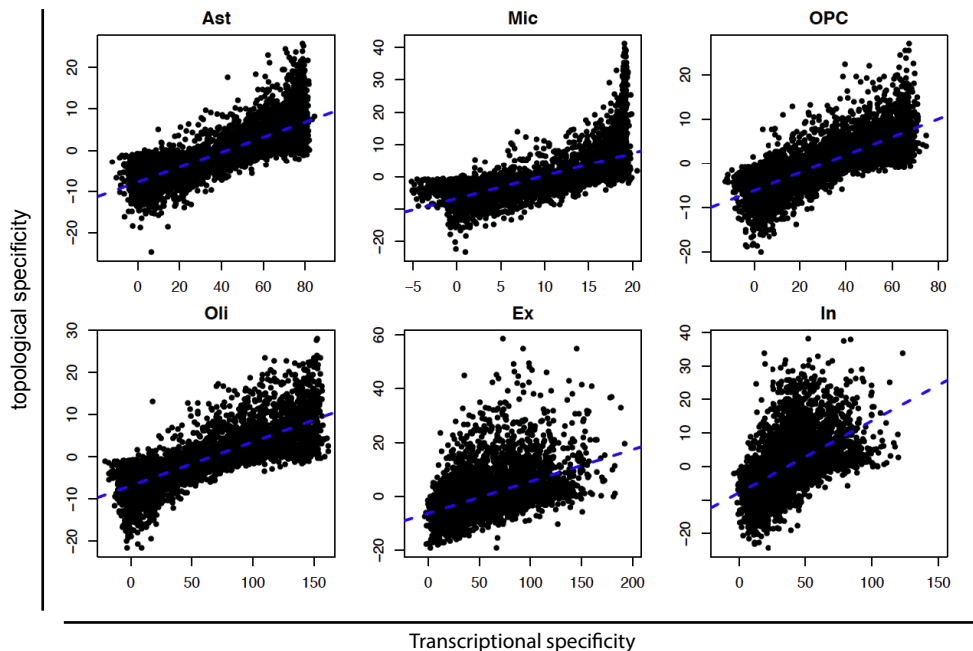

B Topologically specificity genes with unspecific transcription

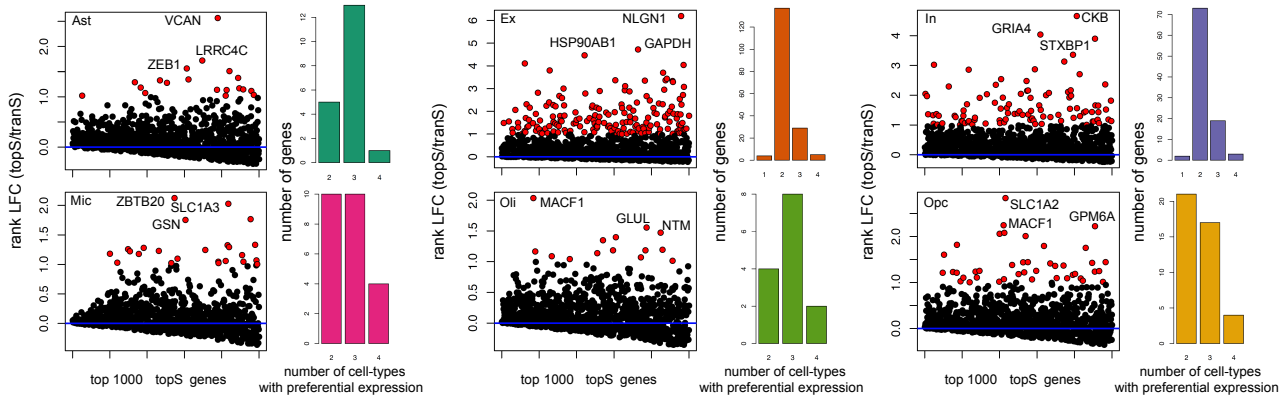



**Figure S4. Consistency of topological and transcriptional specificity, Related to Figure 2. A** Plots show corresponding topological and transcriptional specificity values across genes of each cell-type specific network. Blue line represents the best linear regression fit. **B**, Topologically specific genes that show promiscuous expression across cell-types.

**A**

Genes

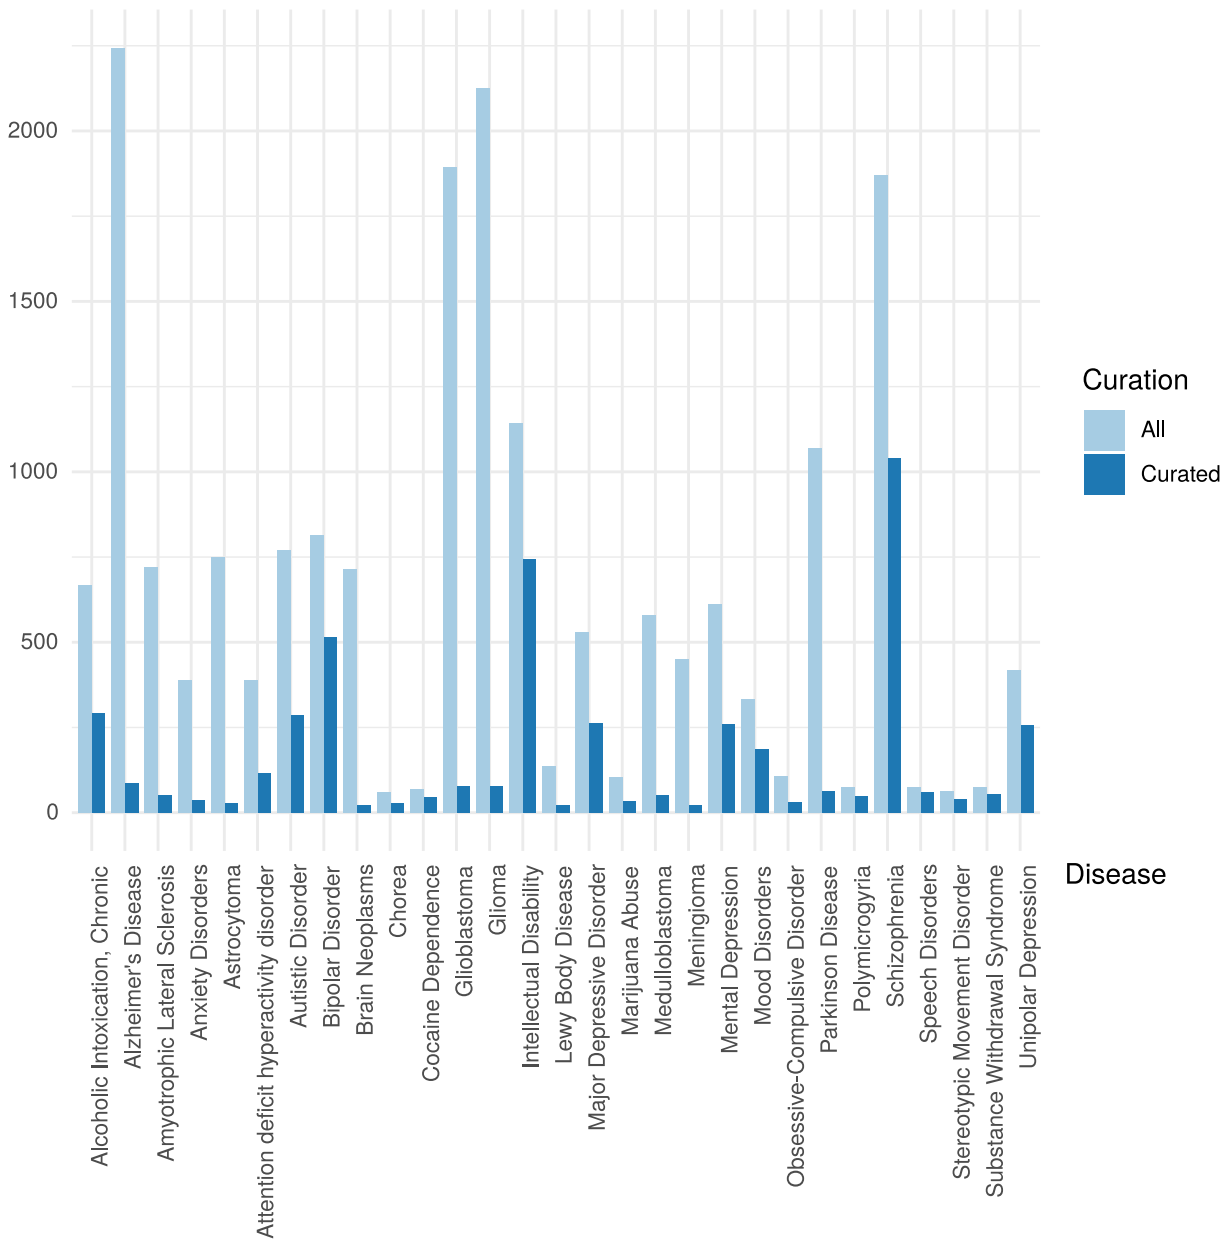**B**

## Modularity of SCZ GWAS genes

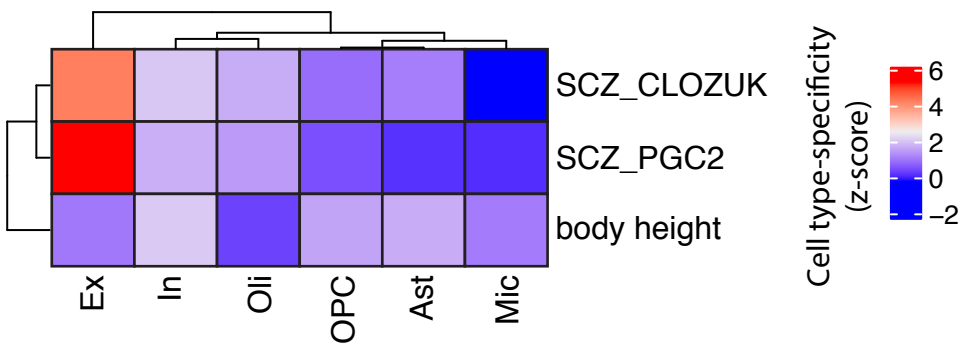

**Figure S5. Disease associated genes, Related to Figure 4. A,** Bars show the number of genes reported to be associated with a given disease in DisGeNET (<http://www.disgenet.org/>). Only genes reported as “curated” in the database (dark blue) were considered in this study. Only brain-related disorders included in this study are shown. **B,** The heatmap shows compactness scores (similar to Figure 4C) for genes identified in major GWAS studies for schizophrenia.

**Table S1. Top 10 proteins topologically specific genes. Related to Figure 2.**

| <b>Ast</b> | <b>Ex</b>  | <b>In</b>  | <b>Mic</b> | <b>Oli</b>  | <b>OPC</b> |
|------------|------------|------------|------------|-------------|------------|
| SLC1A2     | SNAP25     | GRIA1      | PTPRC      | MOG         | PDGFRA     |
| EGFR       | SYT1       | GAD2       | LAPTM5     | PLP1        | ITGAV      |
| GJA1       | CAMK2A     | GRIK1      | SYK        | TMEM144     | FGFR1      |
| PRKCA      | RGS7       | SLC6A1     | FLI1       | TF          | VCAN       |
| FYN        | GRIN2A     | GAD1       | LY86       | MBP         | NRXN1      |
| ATP1A2     | STXBP1     | ERBB4      | INPP5D     | FRYL        | FYN        |
| TIMP3      | GRIA2      | HSP90AB1   | CSF1R      | FGFR2       | BCAN       |
| PLSCR4     | NRXN1      | HSP90AA1   | ARHGAP25   | PICALM      | OLIG2      |
| NTRK2      | SLC17A7    | GRIN2B     | CD53       | ZBTB20      | ZBTB20     |
| CPE        | CAMK2B     | SYT1       | TLR1       | ZNF638      | CNTN1      |
| <b>B</b>   | <b>CD4</b> | <b>CD8</b> | <b>mDC</b> | <b>Mono</b> | <b>NK</b>  |
| DDX21      | EIF3E      | CCL5       | CTSS       | SRGN        | NKG7       |
| PRMT1      | EEF1B2     | NKG7       | CASP1      | PLAUR       | GNLY       |
| RAN        | EIF3H      | GNLY       | TYROBP     | S100A11     | CCL5       |
| MS4A1      | NPM1       | CD8A       | FCER1G     | SOD2        | GZMA       |
| ODC1       | NACA       | CST7       | HCK        | CTSS        | IRF1       |
| NHP2       | BTF3       | TNFAIP3    | AIF1       | ANXA5       | RAC2       |
| SET        | LDHB       | PTPRC      | SRGN       | CD44        | GZMB       |
| NME1       | EIF4B      | IRF1       | LYN        | TIMP1       | CD247      |
| EBNA1BP2   | HINT1      | RUNX3      | MYD88      | CTSB        | CST7       |
| MYC        | NSA2       | JUN        | LST1       | FCER1G      | PRF1       |
